# Supplementary material for: LINE-1 hypomethylation in normal colon mucosa is associated with poor survival in Chinese patients with sporadic colon cancer
Source: PubMed Central journal article supplement (PMC4695154; doi:10.18632/oncotarget.4450), 2015-06-29
Supplement: oncotarget-06-23820-s001.pdf [file oncotarget-06-23820-s001.pdf]

## SUPPLEMENTARY TABLES

Supplementary Table S1: Kolmogorov-Smirnov *Z* tests for normality distribution of LINE-1 methylation rates

| Variable, and grouping factor                  | <i>Z</i> value | <i>p</i> value | Normal distribution |
|------------------------------------------------|----------------|----------------|---------------------|
| Overall (one sample)                           | 0.881          | 0.420          | Yes                 |
| Two independent samples                        |                |                |                     |
| Sex, Male/Female                               | 0.687          | 0.732          | Yes                 |
| Age, ≤60/>60 years<br>Size, ≤5/>5 cm           | 0.5910.521     | 0.8760.949     | YesYes              |
| Location, Left side/Right side                 | 0.854          | 0.459          | Yes                 |
| Mucinous or Signet ring carcinoma, No/Yes      | 0.720          | 0.677          | Yes                 |
| Differentiation, G1-G2/G3-G4                   | 0.520          | 0.950          | Yes                 |
| Perineural invasion, No/Yes                    | 0.899          | 0.393          | Yes                 |
| Extranodal tumor deposits, No/Yes              | 1.062          | 0.210          | Yes                 |
| Tumor stage, T2–T3/T4a–T4b                     | 0.786          | 0.566          | Yes                 |
| Nodal status, N0/N1–2                          | 0.815          | 0.519          | Yes                 |
| Distant metastases, M0/M1                      | 0.795          | 0.552          | Yes                 |
| AJCC Stage, I–II/ III–IV                       | 0.856          | 0.456          | Yes                 |
| Serum CEA level, Normal/Elevated               | 0.524          | 0.947          | Yes                 |
| Serum CA199 level, Normal/Elevated             | 1.092          | 0.184          | Yes                 |
| <i>KRAS</i> gene mutation, Wild type/Mutation  | 1.186          | 0.120          | Yes                 |
| <i>BRAF</i> gene mutation, Wild type/Mutation  | 0.521          | 0.949          | Yes                 |
| <i>NRAS</i> gene mutation, Wild type/Mutation  | 0.686          | 0.735          | Yes                 |
| MS Status, MSI-L or MSS/MSI-H                  | 0.707          | 0.699          | Yes                 |
| 18q LOH, No/Yes                                | 0.778          | 0.580          | Yes                 |
| <i>hMLH1</i> promoter hypermethylation, No/Yes | 0.663          | 0.771          | Yes                 |
| <i>hMSH2</i> promoter Hypermethylation, No/Yes | 0.731          | 0.660          | Yes                 |
| Lymphovascular invasion, No/Yes                | 1.412          | 0.037          | No                  |
| <i>PIK3CA</i> gene mutation, No/Yes            | 1.350          | 0.496          | No                  |

\*A two-tailed *p* value ≤ 0.05 was considered statistically significant. For normality distribution test, a population with a *Z* value > 1 and *p* value > 0.05 was considered as normally distributed.

<sup>a</sup>The left side of the colon consists of the splenic flexure, descending and sigmoid colon. The right side of the colon consists of the cecum, ascending colon, hepatic flexure, and transverse colon.

Abbreviations: AJCC, American Joint Committee on Cancer; CEA, carcinoembryonic antigen; CA199, Carbohydrate antigen 199; MSI, micro-satellite instable; MSS, micro-satellite stable; 18q LOH, loss of heterozygosity at chromosome 18q.

**Supplementary Table S2: Chi-square analysis on patient subgroups according to *KRAS* gene mutation**

| <i>KRAS</i> gene mutation | Left-sided colon | Right-sided colon | X <sup>2</sup> | <i>p</i> |
|---------------------------|------------------|-------------------|----------------|----------|
| Wild Type                 | 40 (71.4%)       | 35 (49.3%)        |                |          |
| Mutation                  | 16 (28.6%)       | 36 (50.7%)        | 6.342          | 0.012    |

**Supplementary Table S3: Chi-square analysis on patient subgroups according to *hMLH1* promoter hypermethylation**

| <i>hMLH1</i> promoter hypermethylation | MSI-L or MSS | MSI-H      | X <sup>2</sup> | <i>p</i> |
|----------------------------------------|--------------|------------|----------------|----------|
| No                                     | 87 (82.9%)   | 14 (63.6%) |                |          |
| Yes                                    | 18 (17.1%)   | 8 (36.4%)  | 4.127          | 0.042    |

**Supplementary Table S4: Stratification analysis for the influence of LMR level on patients' CCSS**

| Variables                 | Stratum     | LMR level | EM (months) | SE    | 95% CI (Lower-upper) | X <sup>2</sup> | <i>p</i> value |
|---------------------------|-------------|-----------|-------------|-------|----------------------|----------------|----------------|
| Age                       | >60 years   | Low       | 47.964      | 6.482 | 35.260–60.668        | 7.953          | 0.005          |
|                           |             | High      | 71.291      | 4.399 | 62.670–79.913        |                |                |
| Size                      | ≤5cm        | Low       | 58.293      | 5.485 | 47.543–69.044        | 4.293          | 0.038          |
|                           |             | High      | 72.495      | 4.024 | 64.607–80.382        |                |                |
| Location <sup>a</sup>     | Right-sided | Low       | 52.482      | 5.925 | 40.869–64.095        | 5.246          | 0.022          |
|                           |             | High      | 69.816      | 4.586 | 60.828–78.804        |                |                |
| Distant metastases        | M0          | Low       | 74.277      | 3.773 | 66.882–81.673        | 5.140          | 0.023          |
|                           |             | High      | 80.893      | 1.551 | 77.852–83.933        |                |                |
| Differentiation           | G3–G4       | Low       | 45.438      | 7.309 | 31.114–59.763        | 4.211          | 0.040          |
|                           |             | High      | 66.701      | 6.452 | 54.055–79.346        |                |                |
| Perineural invasion       | No          | Low       | 60.359      | 4.737 | 51.074–69.644        | 6.232          | 0.013          |
|                           |             | High      | 73.530      | 3.180 | 67.297–79.762        |                |                |
| Serum CEA level           | Normal      | Low       | 61.635      | 5.760 | 50.345–72.925        | 6.181          | 0.013          |
|                           |             | High      | 76.256      | 3.204 | 69.975–82.536        |                |                |
| <i>KRAS</i> gene mutation | Mutation    | Low       | 45.215      | 8.145 | 29.251–61.179        | 11.362         | 0.001          |
|                           |             | High      | 74.456      | 4.087 | 66.446–82.466        |                |                |
| <i>BRAF</i> gene mutation | Wild type   | Low       | 57.304      | 4.813 | 47.870–66.739        | 6.746          | 0.009          |
|                           |             | High      | 71.341      | 3.265 | 64.942–77.741        |                |                |

(Continued)

| Variables                       | Stratum   | LMR level | EM (months) | SE    | 95% CI (Lower-upper) | X <sup>2</sup> | p value |
|---------------------------------|-----------|-----------|-------------|-------|----------------------|----------------|---------|
| PIK3CA gene mutation            | Wild type | Low       | 57.414      | 4.679 | 48.243–66.585        | 5.006          | 0.025   |
|                                 |           | High      | 69.150      | 3.637 | 62.021–76.278        |                |         |
| 18q LOH                         | Yes       | Low       | 49.277      | 6.489 | 36.558–61.996        | 4.210          | 0.040   |
|                                 |           | High      | 65.682      | 4.626 | 56.615–74.748        |                |         |
| hMLH1 promoter hypermethylation | No        | Low       | 54.402      | 5.242 | 44.129–64.676        | 4.939          | 0.026   |
|                                 |           | High      | 68.928      | 3.850 | 61.382–76.473        |                |         |

\*Log Rank (Mantel-Cox) test was used to test the significance of the different survival between the groups according to different variables. A two-tailed  $p$  value  $\leq 0.05$  was considered statistically significant.

<sup>a</sup>The left side of the colon consists of the splenic flexure, descending and sigmoid colon. The right side of the colon consists of the cecum, ascending colon, hepatic flexure, and transverse colon.

Abbreviations: CCSS, colon cancer specific survival; EM, estimated mean; SE, standard error; CI: confidence interval; LMR, LINE-1 methylation rate; 18q LOH, loss of heterozygosity at chromosome 18q; MSI, micro-satellite instable; MSS, micro-satellite stable; CEA, carcinoembryonic antigen; CA199, Carbohydrate antigen 199; AJCC, American Joint Committee on Cancer (AJCC).

**Supplementary Table S5: Student's  $t$  test for the LMRs in various variables**

| Variables                         | Sub-groups      | Mean    | SE      | $t$    | $p$   |
|-----------------------------------|-----------------|---------|---------|--------|-------|
| Sex                               | Male            | 64.7722 | 1.34628 | 0.196  | 0.845 |
|                                   | Female          | 64.3416 | 1.61891 |        |       |
| Age                               | $\leq 60$ years | 63.8597 | 1.75391 | -0.716 | 0.476 |
|                                   | $> 60$ years    | 65.3511 | 1.15971 |        |       |
| Size                              | $\leq 5$ cm     | 64.4210 | 1.12707 | -0.337 | 0.736 |
|                                   | $> 5$ cm        | 65.0823 | 1.72282 |        |       |
| Location <sup>a</sup>             | Left-sided      | 64.2400 | 1.58302 | -0.326 | 0.745 |
|                                   | Right-sided     | 64.9251 | 1.38740 |        |       |
| Mucinous or Signet ring carcinoma | No              | 64.4210 | 1.12707 | -0.391 | 0.696 |
|                                   | Yes             | 65.4472 | 2.64325 |        |       |
| Differentiation                   | G1–G2           | 64.6427 | 1.37045 | 0.024  | 0.981 |
|                                   | G3–G4           | 64.5916 | 1.59979 |        |       |
| Perineural invasion               | No              | 64.2076 | 1.18164 | 0.983  | 0.328 |
|                                   | Yes             | 67.1383 | 1.54461 |        |       |
| Extranodal tumor deposits         | No              | 64.8435 | 1.10761 | -0.504 | 0.615 |
|                                   | Yes             | 63.3695 | 3.00469 |        |       |
| Tumor stage (T)                   | T2–T3           | 66.4479 | 1.29345 | 1.493  | 0.138 |
|                                   | T4a–T4b         | 63.3159 | 1.51421 |        |       |

(Continued)

| Variables                              | Sub-groups   | Mean    | SE      | <i>t</i> | <i>p</i> |
|----------------------------------------|--------------|---------|---------|----------|----------|
| Nodal status (N)                       | N0           | 63.5153 | 1.40564 | -0.992   | 0.323    |
|                                        | N1-2         | 65.5841 | 1.51109 |          |          |
| Distant metastases (M)                 | M0           | 64.6064 | 1.25442 | .027     | .979     |
|                                        | M1           | 64.6703 | 1.83180 |          |          |
| AJCC Stage                             | I-II         | 65.3466 | 1.64836 | 0.668    | 0.506    |
|                                        | III-IV       | 63.9542 | 1.30390 |          |          |
| Serum CEA level                        | Normal       | 64.8810 | 1.36081 | -0.312   | 0.756    |
|                                        | Elevated     | 64.2122 | 1.61891 |          |          |
| Serum CA199 level                      | Normal       | 62.7563 | 1.73554 | -1.242   | 0.216    |
|                                        | Elevated     | 65.5129 | 1.28917 |          |          |
| <i>KRAS</i> gene mutation              | Wild type    | 62.9409 | 1.39699 | 1.965    | 0.052    |
|                                        | Mutation     | 67.0490 | 1.49789 |          |          |
| <i>BRAF</i> gene mutation              | Wild type    | 66.7860 | 3.51702 | 0.420    | 0.675    |
|                                        | Mutation     | 64.5343 | 1.07401 |          |          |
| <i>NRAS</i> gene mutation              | Wild type    | 64.6612 | 1.05439 | -0.235   | 0.814    |
|                                        | Mutation     | 63.0433 | 7.48089 |          |          |
| MSI Status                             | MSI-L or MSS | 65.0744 | 0.98691 | -0.948   | 0.345    |
|                                        | MSI-H        | 62.4686 | 3.76247 |          |          |
| 18q LOH                                | No           | 63.4533 | 1.96858 | 0.921    | 0.359    |
|                                        | Yes          | 65.4079 | 1.13176 |          |          |
| <i>hMLH1</i> promoter hypermethylation | No           | 64.8089 | 1.21354 | -0.351   | 0.726    |
|                                        | Yes          | 63.9008 | 1.92494 |          |          |
| <i>hMSH2</i> promoter Hypermethylation | No           | 64.7881 | 1.15190 | -0.377   | 0.707    |
|                                        | Yes          | 63.6847 | 2.38576 |          |          |

\*A two-tailed *p* value  $\leq 0.05$  was considered statistically significant.

<sup>a</sup>The left side of the colon consists of the splenic flexure, descending and sigmoid colon. The right side of the colon consists of the cecum, ascending colon, hepatic flexure, and transverse colon.

Abbreviations: AJCC, American Joint Committee on Cancer; CEA, carcinoembryonic antigen; CA199, Carbohydrate antigen 199; MSI, micro-satellite instable; MSS, micro-satellite stable; 18q LOH, loss of heterozygosity at chromosome 18q.

**Supplementary Table S6: Primers sequences used in this study**

| Gene                                                                                           | Primer sequence                                                                                                             | Production size (bp) |
|------------------------------------------------------------------------------------------------|-----------------------------------------------------------------------------------------------------------------------------|----------------------|
| <b>Pyrosequencing PCR for LINE-1 methylation status<sup>1</sup></b>                            |                                                                                                                             |                      |
| <i>LINE-1</i>                                                                                  | Forward: 5'-TGGTTAAGGGTTTGGGGATATT-3'<br>Reverse: 5'-Biotin-AACACAATTCCCAACCCAC-3'<br>Sequencing: 5'-AACACAATTCCCAACCCAC-3' | 88                   |
| <b>MS-qPCR for <i>hMHL1</i> and <i>hMSH2</i> gene promoter methylation level<sup>2,3</sup></b> |                                                                                                                             |                      |
| <i>hMHL1</i>                                                                                   | Forward: 5'-ACGTAGACGTTTTATTAGGGTCGC-3'<br>Reverse: 5'-CCTCATCGTAACTACCCGCG-3'                                              | 100                  |
| <i>hMSH2</i>                                                                                   | Forward: 5'-TCGTGGTCGGACGTCG TTC-3'<br>Reverse: 5'-CAACGTCTCCTTCGACTACACCG-3'                                               | 121                  |
| <i>ALU-C4</i>                                                                                  | Forward: 5'-GTTAGGTATAGTGGTTTATATTTGTAATTTTAGTA-3'<br>Reverse: 5'-ATTAATAAATAATCTTAAACTCCTAACCTCA-3'                        | 98                   |
| <b>STR analysis for MSI and 18q LOH status<sup>4,5</sup></b>                                   |                                                                                                                             |                      |
| <i>BAT25</i>                                                                                   | Forward: 5'-FAM-TCGCCTCCAAGAATGTAAGT- 3'<br>Reverse: 5'-TCTGCATTTTAACTATGGCTC-3'                                            | 110-130              |
| <i>BAT26</i>                                                                                   | Forward: 5'-HEX-TGACTACTTTTGACTTCAGCC-3'<br>Reverse: 5'-AACCATTCAACATTTTAAACCC-3'                                           | 100-120              |
| <i>D2S123</i>                                                                                  | Forward: 5'-FAM-AAACAGGATGCCTGCCTTTA-3'<br>Reverse: 5'-GGACTTTCACCTATGGGAC-3'                                               | 197-227              |
| <i>D5S346</i>                                                                                  | Forward: 5'-HEX-AGCAGATAAGACAGTATTACTAGTT-3'<br>Reverse: 5'-ACTCACTCTAGTGATAAATCGGG-3'                                      | 100-130              |
| <i>D17S250</i>                                                                                 | Forward: 5'-FAM-GGAAGAATCAAATAGACAAT-3'<br>Reverse: 5'- GCTGGCCATATATATATTTAAACC-3'                                         | 150-160              |
| <i>BAT40</i>                                                                                   | Forward: 5'-HEX-AGCCAAGATTAACCTCCTACACCACAAC-3'<br>Reverse: 5'-GTAGAGCAAGACCACCTTGTCTC-3'                                   | 120-140              |
| <i>D18S55</i>                                                                                  | Forward: 5'-FAM-GTGTCTTCAATATTGATTCTCTATTCTAGCCT-3'<br>Reverse: 5'-AGCTTCTGAGTAATCTTATGCTGTG-3'                             | 100-120              |
| <i>D18S56</i>                                                                                  | Forward: 5'-HEX-GTGTCTTCTGAAGGACCTGCCTGAGATA-3'<br>Reverse: 5'-CTATACTTTTTATTGTTAGGGTGTG-3'                                 | 95-115               |
| <i>D18S67</i>                                                                                  | Forward: 5'-FAM-CTTGGGTTCCATCTTCAGGAAA-3'<br>Reverse: 5'-GTGTCTTATGAGATAGGCCCAAAGCATC-3'                                    | 95-120               |
| <i>D18S487</i>                                                                                 | Forward: 5'-HEX-GTGTCTTGCCAAATTAAGAATGTATATTATT<br>GC-3'<br>Reverse: 5'-GATTTTCCTCGTGCGTGCTT-3'                             | 85-105               |

**Supplementary Table S7: Point mutations analysis and the primer sets for targeted genes**

| Gene        | Possible DNA point mutation | Associated Codon and AA alteration | Associated Exon | Primer sets (5' to 3')                                           |
|-------------|-----------------------------|------------------------------------|-----------------|------------------------------------------------------------------|
| <i>BRAF</i> | c.1798_1799GT>AA            | p.Val600Lys                        | 15              | Nest PCRs<br>F1: GACTCTAAGAGGAAAGATG<br>R1: ACTGATTTTTGTGAATACTG |
|             | c.1798G>A                   | p.Val600Met                        |                 |                                                                  |
|             | c.1798G>T                   | p.Val600Leu                        |                 |                                                                  |
|             | c.1799T>A                   | p.Val600Glu                        |                 | F2: CTCATAATGCTTGCTCTGATAGG                                      |
|             | c.1799T>C                   | p.Val600Ala                        |                 | R2: AGCCTCAATTCTTACCATCCAC                                       |
|             | c.1799T>G                   | p.Val600Gly                        |                 |                                                                  |
| <i>KRAS</i> | c.34G>A                     | p.Gly12Ser                         | 2               | 1F: TCTTAAGCGTCGATGGAGG<br>1R: AAGAATGGTCCTGCACCAG               |
|             | c.34G>C                     | p.Gly12Arg                         |                 |                                                                  |
|             | c.34G>T                     | p.Gly12Cys                         |                 |                                                                  |
|             | c.35G>A                     | p.Gly12Asp                         |                 |                                                                  |
|             | c.35_36delinsCA             | p.Gly12Ala                         |                 |                                                                  |
|             | c.35G>C                     | p.Gly12Ala                         |                 |                                                                  |
|             | c.35G>T                     | p.Gly12Val                         |                 |                                                                  |
|             | c.37G>A                     | p.Gly13Ser                         |                 |                                                                  |
|             | c.37G>C                     | p.Gly13Arg                         |                 |                                                                  |
|             | c.37G>T                     | p.Gly13Cys                         |                 |                                                                  |
|             | c.37G>C                     | p.Gly13Arg                         |                 |                                                                  |
|             | c.38G>A                     | p.Gly13Asp                         |                 |                                                                  |
|             | c.38G>C                     | p.Gly13Ala                         |                 |                                                                  |
|             | c.38G>T                     | p.Gly13Val                         |                 |                                                                  |
|             | c.180_181delinsAA           | p.Gln61Lys                         | 3               | 2F: CCGTCATCTTTGGAGCAGG<br>2R: TACCGATGCAGTCTGGAGC               |
|             | c.181C>A                    | p.Gln61Lys                         |                 |                                                                  |
|             | c.181C>G                    | p.Gln61Glu                         |                 |                                                                  |
|             | c.181C>T                    | p.Gln61X                           |                 |                                                                  |
| c.182A>C    | p.Gln61Pro                  |                                    |                 |                                                                  |
| c.182A>G    | p.Gln61Arg                  |                                    |                 |                                                                  |
| c.182A>T    | p.Gln61Leu                  |                                    |                 |                                                                  |
| c.183A>C    | p.Gln61His                  |                                    |                 |                                                                  |
| c.183A>T    | p.Gln61His                  |                                    |                 |                                                                  |
|             | c.436G>A                    | p.Ala146Thr                        | 4               | 3F: CACAAAACAGGCTCAGGACTT<br>3R: GCCAAAAGCAGTACCATGGA            |
|             | c.436G>C                    | p.Ala146Pro                        |                 |                                                                  |
|             | c.437C>T                    | p.Ala146Val                        |                 |                                                                  |
| <i>NRAS</i> | c.34G>A                     | p.Gly12Ser                         | 2               | 1F: TGTAGATGTGGCTCGCCAA<br>1R: CGCTACTATGGCCTGTGTT               |

(Continued)

| Gene          | Possible DNA point mutation | Associated Codon and AA alteration | Associated Exon | Primer sets (5' to 3')                                |
|---------------|-----------------------------|------------------------------------|-----------------|-------------------------------------------------------|
|               | c.34G>C                     | p.Gly12Arg                         |                 |                                                       |
|               | c.34G>T                     | p.Gly12Cys                         |                 |                                                       |
|               | c.35G>A                     | p.Gly12Asp                         |                 |                                                       |
|               | c.35G>C                     | p.Gly12Ala                         |                 |                                                       |
|               | c.35G>T                     | p.Gly12Val                         |                 |                                                       |
|               | c.37G>A                     | p.Gly13Ser                         |                 |                                                       |
|               | c.37G>C                     | p.Gly13Arg                         |                 |                                                       |
|               | c.37G>T                     | p.Gly13Cys                         |                 |                                                       |
|               | c.38G>A                     | p.Gly13Asp                         |                 |                                                       |
|               | c.38G>C                     | p.Gly13Ala                         |                 |                                                       |
|               | c.38G>T                     | p.Gly13Val                         |                 |                                                       |
|               | c.181C>A                    | p.Gln61Lys                         | 3               | 2F: GCAATTTGAGGGACAAACCA<br>2R: CTCCTAGTACCTGTAGAGGTT |
|               | c.181C>G                    | p.Gln61Glu                         |                 |                                                       |
|               | c.181C>T                    | p.Glu61X                           |                 |                                                       |
|               | c.182A>C                    | p.Gln61Pro                         |                 |                                                       |
|               | c.182A>G                    | p.Gln61Arg                         |                 |                                                       |
|               | c.182A>T                    | p.Gln61Leu                         |                 |                                                       |
|               | c.183A>C                    | p.Gln61His                         |                 |                                                       |
|               | c.183A>T                    | p.Gln61His                         |                 |                                                       |
| <i>PIK3CA</i> | c.1624G>A                   | p.Glu542Lys                        | 9               | 1F: TCTGTGAATCCAGAGGGGA<br>2R: AACATGCTGAGATCAGCCA    |
|               | c.1624G>C                   | p.Glu542Gln                        |                 |                                                       |
|               | c.1633G>A                   | p.Glu545Lys                        |                 |                                                       |
|               | c.1633G>C                   | p.Glu545Gln                        |                 |                                                       |
|               | c.1636C>A                   | p.Gln546Lys                        |                 |                                                       |
|               | c.1636C>G                   | p.Gln546Glu                        |                 |                                                       |
|               | c.1637A>C                   | p.Gln546Pro                        |                 |                                                       |
|               | c.1637A>G                   | p.Gln546Arg                        |                 |                                                       |
|               | c.1637A>T                   | p.Gln546Leu                        |                 |                                                       |
|               | c.3139C>T                   | p.His1047Tyr                       | 20              | 2F: CTTGGCTCTGGAATGCCAG<br>2R: ATGCAATCGGTCTTTGCCT    |
|               | c.3140A>G                   | p.His1047Arg                       |                 |                                                       |
|               | c.3140A>T                   | p.His1047Leu                       |                 |                                                       |
|               | c.3145G>A                   | p.Gly1049Ser                       |                 |                                                       |
|               | c.3145G>C                   | p.Gly1049Arg                       |                 |                                                       |

Abbreviations: AA, amino acid; BRAF, v-raf murine sarcoma viral oncogene homolog B; KRAS, Kirsten rat sarcoma viral oncogene homolog; NRAS, neuroblastoma RAS viral oncogene homolog; PIK3CA, phosphatidylinositol-4, 5-bisphosphate 3-kinase, catalytic subunit a.

## REFERENCES

1. Hur K, Cejas P, Feliu J, et al. Hypomethylation of long interspersed nuclear element-1 (LINE-1) leads to activation of proto-oncogenes in human colorectal cancer metastasis. *Gut*. 2014; 63:635–646.
2. Farris AB 3rd, Demicco EG, Le LP, et al. Clinicopathologic and molecular profiles of microsatellite unstable Barrett Esophagus-associated adenocarcinoma. *Am J Surg Pathol*. 2011; 35:647–655.
3. Weisenberger DJ, Campan M, Long TI, et al. Analysis of repetitive element DNA methylation by MethyLight. *Nucleic Acids Res*. 2005; 33:6823–6836.
4. Wooster R, Cleton-Jansen AM, Collins N, et al. Instability of short tandem repeats (microsatellites) in human cancers. *Nat Genet*. 1994; 6:152–156.
5. Ogino S, Brahmandam M, Cantor M, et al. Distinct molecular features of colorectal carcinoma with signet ring cell component and colorectal carcinoma with mucinous component. *Mod Pathol*. 2006; 19:59–68.
